# Supplementary material for: In Silico Evaluation of Nonsynonymous SNPs in Human ADAM33: The Most Common Form of Genetic Association to Asthma Susceptibility
Source: Hindawi journal article supplement (doi:10.1155/2022/1089722), 2022-11-12
Supplement: f1 [file 1089722.f1.zip]

**Table S2:** Prediction of ubiquitination site in ADAM33 protein using BDM-PUB server

| Peptide         | Position | Score | Threshold |
|-----------------|----------|-------|-----------|
| ELLLELEKNHRLLAP | 83       | 0.63  | 0.3       |
| PWPPRGSKDFSTHEI | 159      | 1.41  | 0.3       |
| MEQLLTWKGTCGHRD | 176      | 0.65  | 0.3       |
| GHRDPGNKAGMTSLP | 187      | 0.96  | 0.3       |
| REARRTRKYLELYIV | 210      | 1.05  | 0.3       |
| QLRAFFRKGGGACLS | 399      | 1.49  | 0.3       |
| CCVRCLLKPAALCR  | 469      | 1.56  | 0.3       |
| GRDALCGKLQCQGGK | 575      | 1.66  | 0.3       |
| KLQCQGGKPSLLAPH | 582      | 0.98  | 0.3       |
| CQSRRCRKNAFQELQ | 644      | 1.65  | 0.3       |
| WAPPFCDKPGFGGSM | 682      | 0.68  | 0.3       |
| DPACSGPKDGPHRDH | 749      | 1.71  | 0.3       |
| EPSSHPEKPLPAVSP | 791      | 0.75  | 0.3       |
