# Supplementary material for: In Silico Evaluation of Nonsynonymous SNPs in Human ADAM33: The Most Common Form of Genetic Association to Asthma Susceptibility
Source: Hindawi journal article supplement (doi:10.1155/2022/1089722), 2022-11-12
Supplement: f1 [file 1089722.f1.zip]

| N-linked Glycosites |               |                        | O-linked Glycosites |               |                        | C-linked Glycosites |               |                  |
|---------------------|---------------|------------------------|---------------------|---------------|------------------------|---------------------|---------------|------------------|
| Position            | Residue Score | Prediction             | Position            | Residue Score | Prediction             | Position            | Residue Score | Prediction       |
| 84                  | -0.75738241   | Non-glycosylated       | 11                  | -0.008041936  | Non-glycosylated       | 3                   | -0.5510491    | Non-glycosylated |
| 109                 | 1.1133404     | Potential Glycosylated | 41                  | 0.017683314   | Potential Glycosylated | 23                  | -0.63565208   | Non-glycosylated |
| 145                 | 0.74524993    | Potential Glycosylated | 53                  | 0.14775573    | Potential Glycosylated | 44                  | -0.44351012   | Non-glycosylated |
| 186                 | -1.263588     | Non-glycosylated       | 55                  | 0.13899511    | Potential Glycosylated | 51                  | -0.56757255   | Non-glycosylated |
| 229                 | -0.96618467   | Non-glycosylated       | 61                  | 0.064735369   | Potential Glycosylated | 127                 | -0.38798279   | Non-glycosylated |
| 231                 | 0.93513567    | Potential Glycosylated | 95                  | 0.21011165    | Potential Glycosylated | 153                 | -0.4564656    | Non-glycosylated |
| 242                 | -0.9980678    | Non-glycosylated       | 111                 | 0.020847242   | Potential Glycosylated | 175                 | -0.70791733   | Non-glycosylated |
| 276                 | 1.1491922     | Potential Glycosylated | 126                 | -0.07743013   | Non-glycosylated       | 263                 | -0.41029443   | Non-glycosylate  |
| 407                 | -1.0217595    | Non-glycosylated       | 132                 | -0.11841244   | Non-glycosylated       | 280                 | -0.59604798   | Non-glycosylated |
| 422                 | -1.2994016    | Non-glycosylated       | 134                 | -0.16366568   | Non-glycosylated       | 285                 | -0.77052887   | Non-glycosylated |
| 448                 | 0.85056617    | Potential Glycosylated | 137                 | -0.2218519    | Non-glycosylated       | 290                 | -0.64643199   | Non-glycosylated |
| 546                 | -1.2768468    | Non-glycosylated       | 141                 | -0.14758465   | Non-glycosylated       | 515                 | -0.56108422   | Non-glycosylated |
| 554                 | -1.0981906    | Non-glycosylated       | 143                 | -0.16199966   | Non-glycosylated       | 530                 | -0.56807419   | Non-glycosylated |
| 645                 | -1.0863686    | Non-glycosylated       | 147                 | 0.0208001     | Potential Glycosylated | 675                 | -0.70722165   | Non-glycosylated |
| 664                 | -1.1641786    | Non-glycosylated       | 158                 | -0.052241223  | Non-glycosylated       | 722                 | -0.56299283   | Non-glycosylated |
| 666                 | -1.2469535    | Non-glycosylated       | 162                 | -0.042439932  | Non-glycosylated       | 737                 | -0.47025367   | Non-glycosylated |
| 668                 | -1.212558     | Non-glycosylated       | 163                 | -0.22618827   | Non-glycosylated       | 775                 | -0.51115416   | Non-glycosylated |
| 698                 | -0.85489265   | Non-glycosylated       | 174                 | -0.1674848    | Non-glycosylated       | 813                 | -0.55151633   | Non-glycosylated |
| 781                 | -1.002133     | Non-glycosylated       | 178                 | -0.17008351   | Non-glycosylated       |                     |               |                  |
|                     |               |                        | 191                 | 0.099266654   | Potential Glycosylated |                     |               |                  |
|                     |               |                        | 192                 | 0.15203628    | Potential Glycosylated |                     |               |                  |
|                     |               |                        | 199                 | 0.033640983   | Potential Glycosylated |                     |               |                  |
|                     |               |                        | 208                 | -0.041493815  | Non-glycosylated       |                     |               |                  |
|                     |               |                        | 221                 | -0.065626414  | Non-glycosylated       |                     |               |                  |
|                     |               |                        | 225                 | -0.089431455  | Non-glycosylated       |                     |               |                  |
|                     |               |                        | 233                 | -0.01953224   | Non-glycosylated       |                     |               |                  |
|                     |               |                        | 250                 | -0.0061406778 | Non-glycosylated       |                     |               |                  |
|                     |               |                        | 258                 | -0.07450101   | Non-glycosylated       |                     |               |                  |
|                     |               |                        | 264                 | -0.12088642   | Non-glycosylated       |                     |               |                  |

|     |               |                        |
|-----|---------------|------------------------|
| 269 | -0.11950397   | Non-glycosylated       |
| 272 | 0.0022645529  | Potential Glycosylated |
| 278 | -0.021963579  | Non-glycosylated       |
| 297 | 0.014469633   | Potential Glycosylated |
| 302 | 0.19336471    | Potential Glycosylated |
| 310 | -0.06636103   | Non-glycosylated       |
| 324 | -0.0089418155 | Non-glycosylated       |
| 325 | -0.11577082   | Non-glycosylated       |
| 329 | -0.0038611931 | Non-glycosylated       |
| 330 | 0.21967785    | Potential Glycosylated |
| 333 | 0.27408455    | Potential Glycosylated |
| 342 | -0.014657802  | Non-glycosylated       |
| 350 | -0.090528209  | Non-glycosylated       |
| 354 | -0.087275927  | Non-glycosylated       |
| 368 | -0.0081473722 | Non-glycosylated       |
| 377 | 0.05576549    | Potential Glycosylated |
| 386 | -0.028509932  | Non-glycosylated       |
| 389 | -0.031181631  | Non-glycosylated       |
| 406 | -0.023705064  | Non-glycosylated       |
| 450 | -0.035364814  | Non-glycosylated       |
| 489 | 0.011167192   | Potential Glycosylated |
| 491 | 0.17105456    | Potential Glycosylated |
| 492 | 0.27170437    | Potential Glycosylated |
| 493 | 0.32483205    | Potential Glycosylated |
| 505 | -0.059114232  | Non-glycosylated       |
| 511 | -0.061842677  | Non-glycosylated       |
| 521 | -0.035476011  | Non-glycosylated       |
| 534 | -0.016521484  | Non-glycosylated       |
| 547 | -0.051190277  | Non-glycosylated       |
| 559 | -0.054381553  | Non-glycosylated       |
| 584 | -0.0037674937 | Non-glycosylated       |

|     |               |                        |
|-----|---------------|------------------------|
| 595 | 0.040512395   | Potential Glycosylated |
| 596 | 0.026744187   | Potential Glycosylated |
| 605 | 0.19823099    | Potential Glycosylated |
| 614 | 0.066121128   | Potential Glycosylated |
| 629 | 0.013426558   | Potential Glycosylated |
| 639 | 0.030352585   | Potential Glycosylated |
| 655 | -0.025484912  | Non-glycosylated       |
| 659 | -0.089604904  | Non-glycosylated       |
| 665 | -0.034440488  | Non-glycosylated       |
| 688 | -0.048535275  | Non-glycosylated       |
| 691 | -0.069729603  | Non-glycosylated       |
| 701 | -0.0073701317 | Non-glycosylated       |
| 709 | 0.0053411819  | Potential Glycosylated |
| 736 | -0.069919075  | Non-glycosylated       |
| 746 | -0.043307183  | Non-glycosylated       |
| 769 | 0.1283968     | Potential Glycosylated |
| 771 | 0.27119581    | Potential Glycosylated |
| 782 | 0.012007174   | Potential Glycosylated |
| 786 | 0.035984737   | Potential Glycosylated |
| 787 | 0.055670894   | Potential Glycosylated |
| 797 | 0.014707479   | Potential Glycosylated |
| 810 | 0.0057643317  | Potential Glycosylated |
