# Supplementary material for: In Silico Evaluation of Nonsynonymous SNPs in Human ADAM33: The Most Common Form of Genetic Association to Asthma Susceptibility
Source: Hindawi journal article supplement (doi:10.1155/2022/1089722), 2022-11-12
Supplement: f1 [file 1089722.f1.zip]

**Table S1:** The prediction outcomes for the nsSNPs effect on ADAM33 protein by MutPred server.

| SNP ID       | AAS   | Probability of deleterious amino acid substitution | Top 5 features                                                                                                                                                                               |
|--------------|-------|----------------------------------------------------|----------------------------------------------------------------------------------------------------------------------------------------------------------------------------------------------|
| rs773091023  | P678L | 0.800                                              | Altered Transmembrane protein<br>Loss of Loop<br>Gain of Disulfide linkage at C680                                                                                                           |
| rs764301730  | C671R | 0.951                                              | Altered Metal binding<br>Altered Transmembrane protein<br>Gain of Catalytic site at C671<br>Loss of Disulfide linkage at C671                                                                |
| rs751597707  | C669G | 0.937                                              | Altered Metal binding<br>Altered Transmembrane protein<br>Altered Stability<br>Gain of Disulfide linkage at C671<br>Gain of Catalytic site at C669                                           |
| rs368984072  | G661R | 0.897                                              | Altered Metal binding<br>Altered Transmembrane protein<br>Loss of Disulfide linkage at C663                                                                                                  |
| rs777553708  | C637Y | 0.943                                              | Altered Transmembrane protein<br>Loss of Disulfide linkage at C637<br>Altered Metal binding<br>Gain of Strand<br>Altered Disordered interface                                                |
| rs1334863089 | C631F | 0.953                                              | Altered Metal binding<br>Altered Transmembrane protein<br>Loss of Disulfide linkage at C631<br>Gain of Catalytic site at C631                                                                |
| rs754867141  | C606S | 0.857                                              | Loss of Disulfide linkage at C606<br>Altered Metal binding<br>Altered Transmembrane protein<br>Altered Stability<br>Gain of O-linked glycosylation at T605<br>Gain of Catalytic site at C606 |
| rs754867141  | C606Y | 0.915                                              | Loss of Disulfide linkage at C606<br>Altered Metal binding<br>Altered Transmembrane protein<br>Gain of Catalytic site at C606                                                                |
| rs915448220  | C573Y | 0.953                                              | Altered Metal binding<br>Altered Transmembrane protein<br>Gain of Strand<br>Gain of Catalytic site at C573<br>Loss of Disulfide linkage at C573                                              |
| rs1432549895 | C519R | 0.940                                              | Loss of Disulfide linkage at C519<br>Gain of Catalytic site at C519<br>Altered Transmembrane protein<br>Altered Metal binding<br>Loss of Pyrrolidone carboxylic acid at Q524                 |
| rs1262246273 | Y513C | 0.898                                              | Altered Transmembrane protein<br>Gain of Intrinsic disorder<br>Loss of Disulfide linkage at C514<br>Loss of Strand<br>Altered Ordered interface                                              |
| rs1203116461 | P496L | 0.668                                              | Altered Transmembrane protein                                                                                                                                                                |

|              |       |       |                                                                                                                                                                              |
|--------------|-------|-------|------------------------------------------------------------------------------------------------------------------------------------------------------------------------------|
|              |       |       | Gain of Helix<br>Loss of Strand<br>Loss of Loop<br>Altered Metal binding                                                                                                     |
| rs757567846  | D483A | 0.839 | Altered Metal binding<br>Gain of Disulfide linkage at C482<br>Altered Transmembrane protein                                                                                  |
| rs1424975479 | C482F | 0.900 | Altered Metal binding<br>Loss of Disulfide linkage at C482<br>Altered Transmembrane protein<br>Loss of Pyrrolidone carboxylic acid at Q477                                   |
| rs1165412077 | C482S | 0.794 | Altered Metal binding<br>Loss of Disulfide linkage at C482<br>Altered Transmembrane protein<br>Loss of Pyrrolidone carboxylic acid at Q477<br>Gain of Catalytic site at C482 |
| rs779669835  | R476C | 0.834 | Altered Metal binding<br>Loss of Disulfide linkage at C475<br>Loss of Pyrrolidone carboxylic acid at Q477<br>Altered Transmembrane protein                                   |
| rs748720838  | C475G | 0.942 | Altered Metal binding<br>Loss of Disulfide linkage at C475<br>Loss of Pyrrolidone carboxylic acid at Q477<br>Altered Transmembrane protein                                   |
| rs528261077  | G472V | 0.828 | Altered Metal binding<br>Gain of Disulfide linkage at C475<br>Gain of Pyrrolidone carboxylic acid at Q477                                                                    |
| rs1378161696 | C463Y | 0.915 | Altered Metal binding<br>Loss of Intrinsic disorder<br>Altered Transmembrane protein<br>Gain of Disulfide linkage at C462                                                    |
| rs768654352  | G460R | 0.856 | Gain of Helix<br>Altered Metal binding<br>Gain of Disulfide linkage at C457<br>Altered Transmembrane protein<br>Gain of Pyrrolidone carboxylic acid at Q456                  |
| rs1192357091 | C444S | 0.852 | Altered Metal binding<br>Loss of Disulfide linkage at C444<br>Altered Transmembrane protein<br>Gain of N-linked glycosylation at N448                                        |
| rs1192357091 | C444Y | 0.914 | Altered Metal binding<br>Loss of Intrinsic disorder<br>Loss of Disulfide linkage at C444<br>Altered Transmembrane protein<br>Gain of N-linked glycosylation at N448          |
| rs777252478  | C439Y | 0.790 | Loss of Intrinsic disorder<br>Altered Metal binding<br>Loss of Disulfide linkage at C444                                                                                     |
| rs1321728445 | C431S | 0.881 | Altered Metal binding<br>Gain of Strand<br>Gain of B-factor<br>Altered Transmembrane protein<br>Loss of Disulfide linkage at C431                                            |
| rs747255442  | G428C | 0.813 | Altered Metal binding<br>Altered Transmembrane protein                                                                                                                       |

|              |       |        |                                                                                                                                                          |
|--------------|-------|--------|----------------------------------------------------------------------------------------------------------------------------------------------------------|
|              |       |        | Gain of Disulfide linkage at C433                                                                                                                        |
| rs776082098  | C420Y | 0.917  | Loss of Intrinsic disorder<br>Altered Metal binding<br>Gain of Strand<br>Altered Transmembrane protein<br>Loss of Disulfide linkage at C420              |
| rs751613984  | C388Y | 0.884  | Altered Metal binding<br>Altered Disordered interface<br>Altered Transmembrane protein<br>Loss of Disulfide linkage at C388<br>Gain of Sulfation at C388 |
| rs1313175203 | C371Y | 0.963  | Altered Metal binding<br>Gain of Strand<br>Loss of Disulfide linkage at C371<br>Altered Transmembrane protein<br>Gain of Catalytic site at C371          |
| rs764090883  | C371R | 0.971  | Altered Metal binding<br>Gain of Intrinsic disorder<br>Gain of Strand<br>Loss of Disulfide linkage at C371<br>Altered Transmembrane protein              |
| rs1297854732 | C360R | 0.882  | Altered Metal binding<br>Gain of Strand<br>Loss of Disulfide linkage at C360<br>Gain of Allosteric site at H355<br>Loss of Catalytic site at H355        |
| rs1351880201 | D219V | 0.9355 | Altered Ordered interface<br>Altered Metal binding<br>Altered Transmembrane protein<br>Altered Disordered interface<br>Loss of Sulfation at Y215         |
