# Supplementary material for: In Silico Evaluation of Nonsynonymous SNPs in Human ADAM33: The Most Common Form of Genetic Association to Asthma Susceptibility
Source: Hindawi journal article supplement (doi:10.1155/2022/1089722), 2022-11-12
Supplement: f1 [file 1089722.f1.zip]

**Table S3:** Prediction of phosphorylation sites in ADAM33 protein using NetPhos server

| Amino Acid Position | Context   | Score | Kinase           |
|---------------------|-----------|-------|------------------|
| 11 T                | RARGTPLLL | 0.957 | unspecified      |
| 55 S                | WRTVSLEEP | 0.995 | unspecified      |
| 61 S                | EEPVSKPDM | 0.964 | unspecified      |
| 162 S               | SKDFSTHEI | 0.995 | unspecified      |
| 269 S               | ERDRSRVTQ | 0.996 | unspecified      |
| 302 T               | AQLLTGRAF | 0.902 | Protein Kinase C |
| 324 S               | CRAESSGGV | 0.920 | unspecified      |
| 329 S               | SGGVSTDHS | 0.947 | unspecified      |
| 511 S               | CARGSGYCW | 0.962 | unspecified      |
| 547 S               | QVVNSAGDA | 0.988 | unspecified      |
| 639 S               | MVCQSRRCR | 0.913 | Protein Kinase C |
| 787 S               | HEPSSHPEK | 0.992 | unspecified      |
| 797 S               | LPAVSPDPQ | 0.909 | unspecified      |
