# Supplementary figures and images for: In Silico Evaluation of Nonsynonymous SNPs in Human ADAM33: The Most Common Form of Genetic Association to Asthma Susceptibility
Source: Hindawi journal article supplement (doi:10.1155/2022/1089722), 2022-11-12

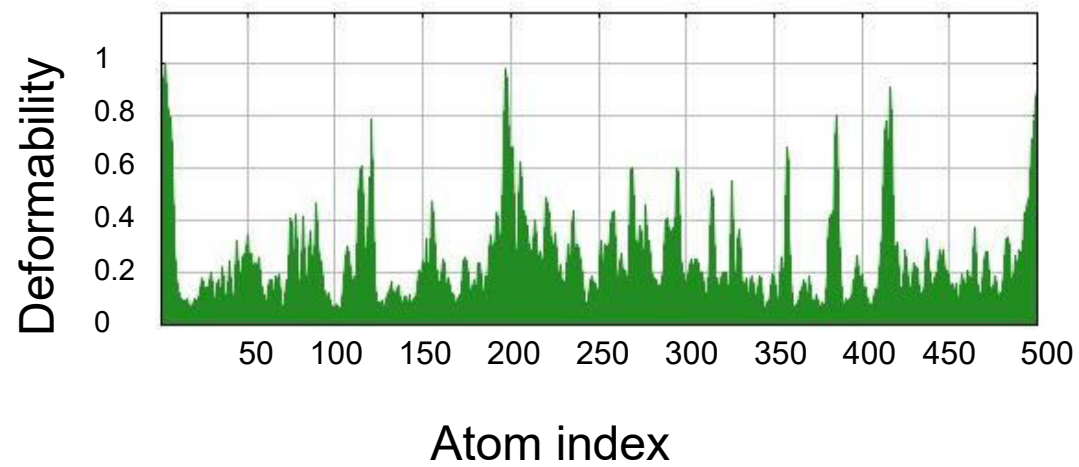

a

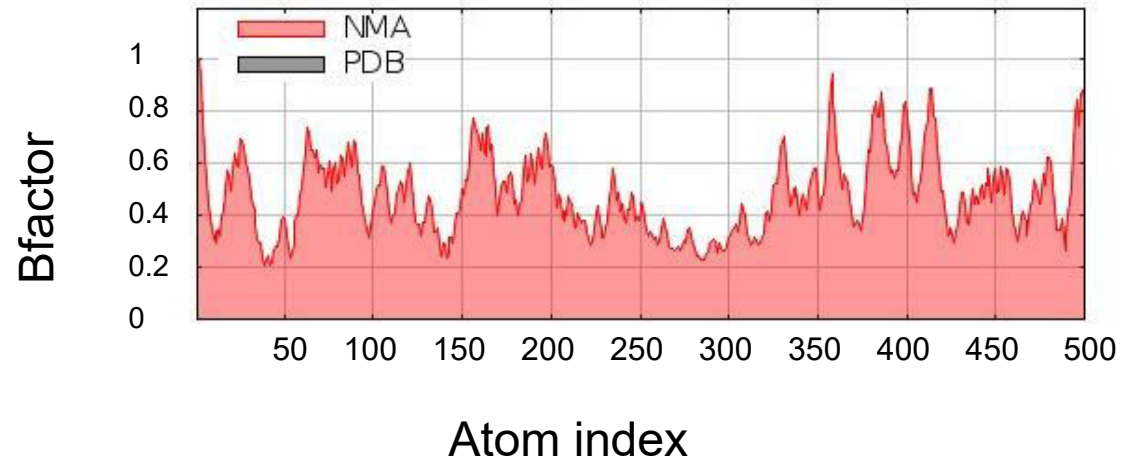

b

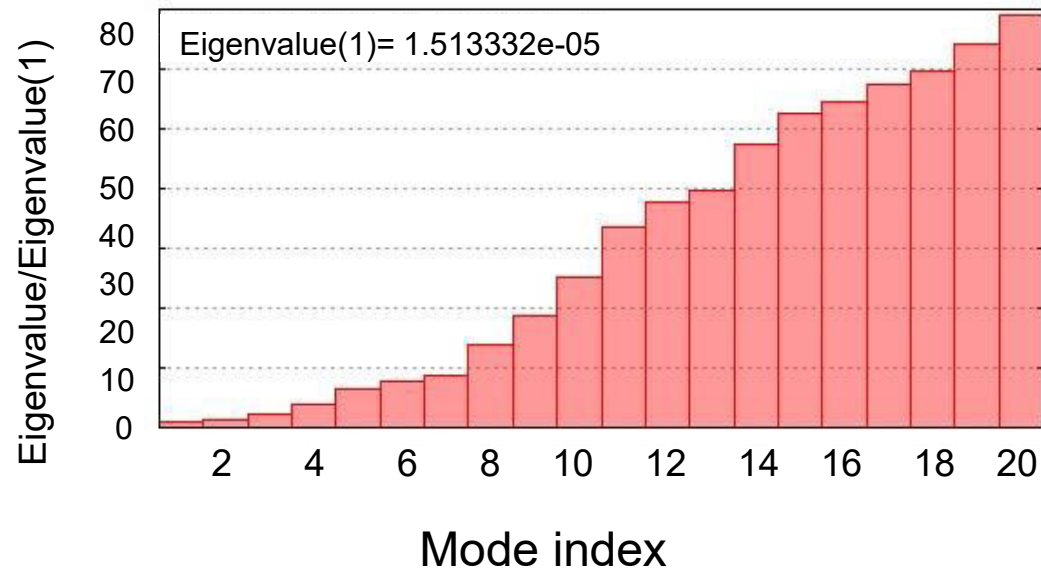

c

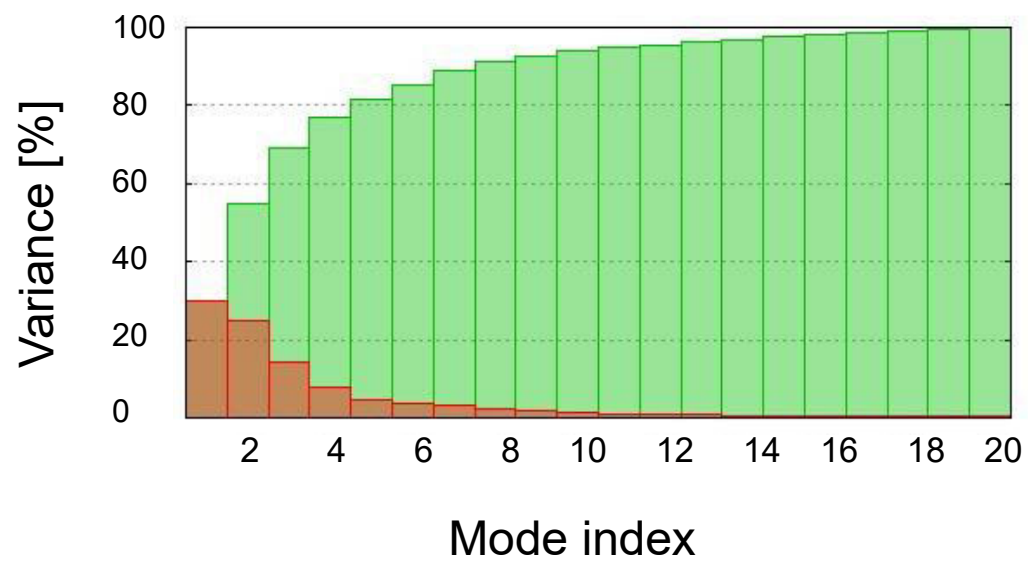

d

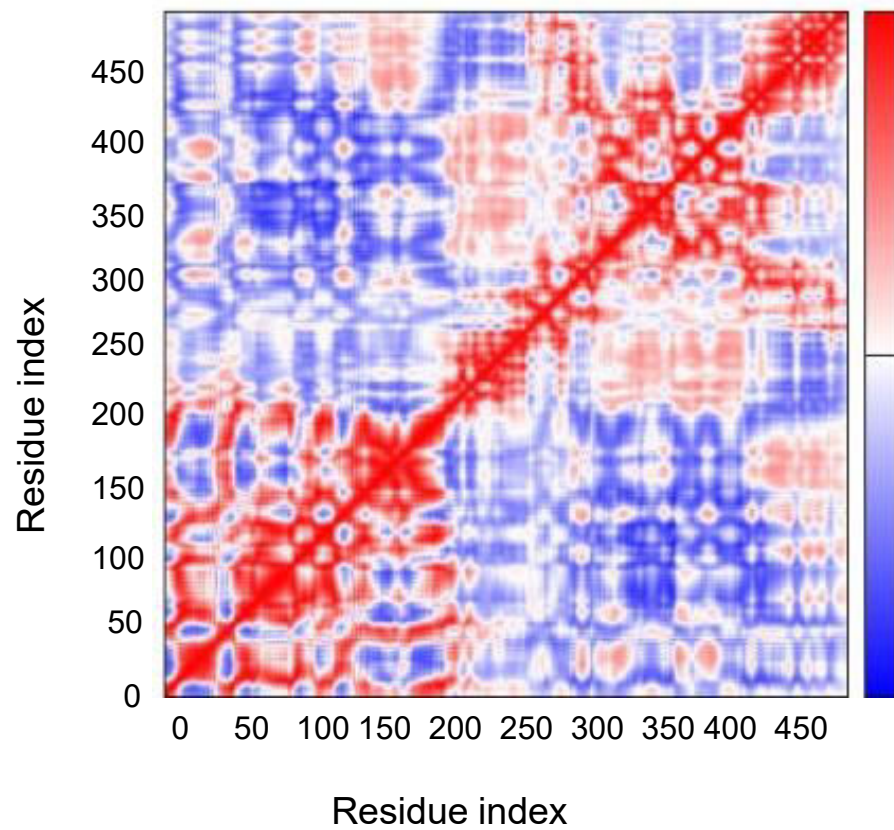

e

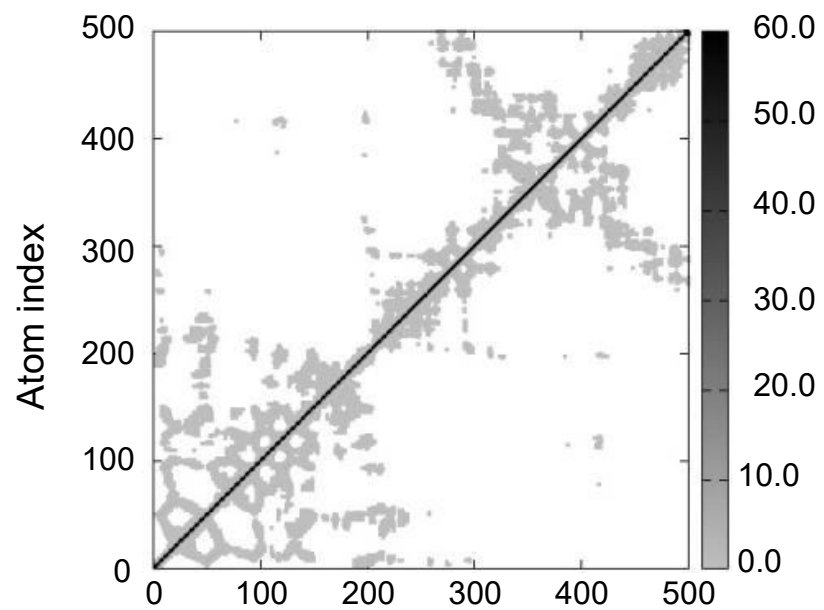

f

Atom index

Supplement: f1 [file 1089722.f1.zip]

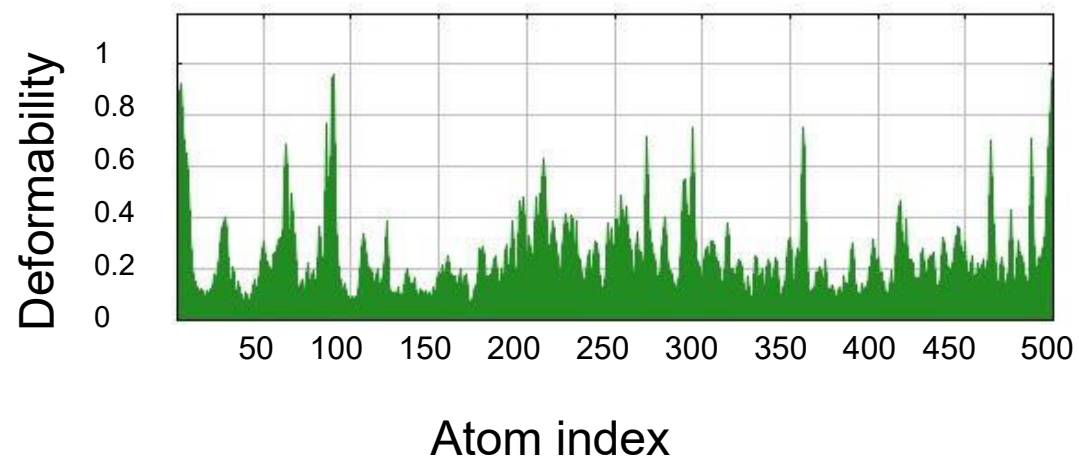

a

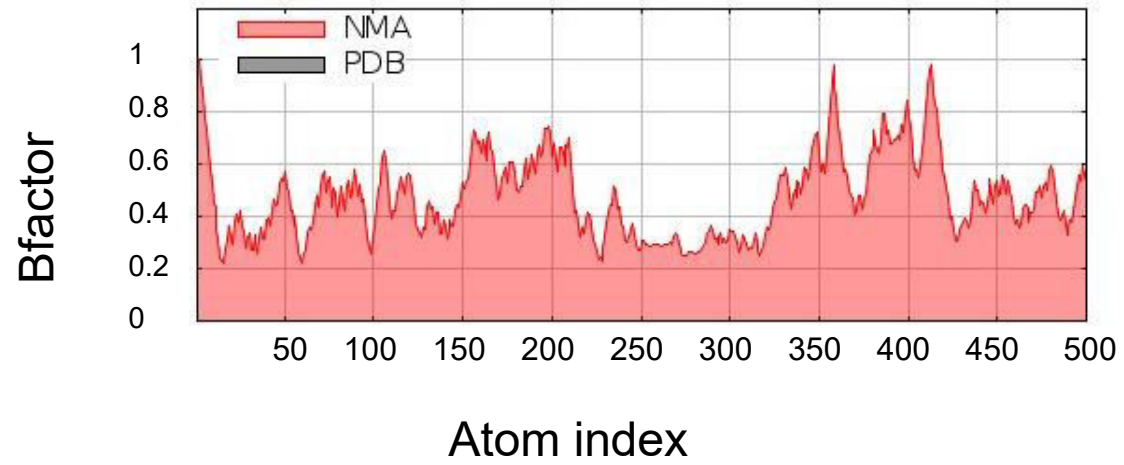

b

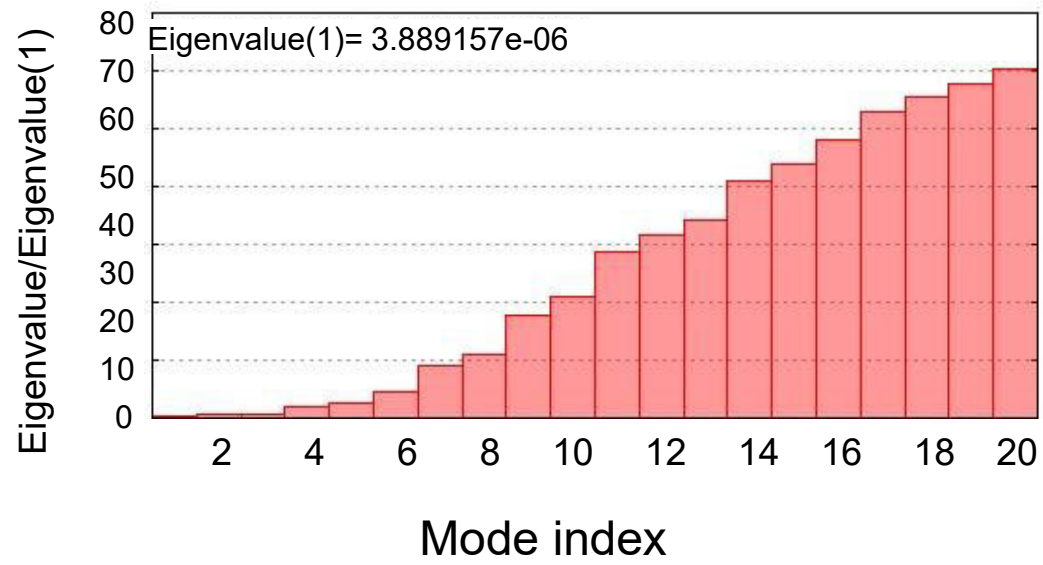

c

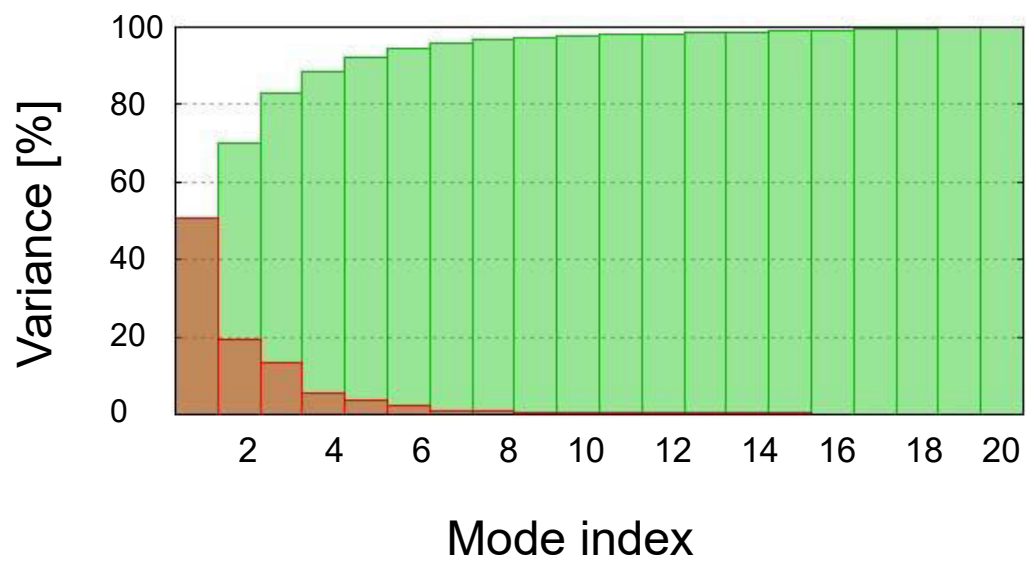

d

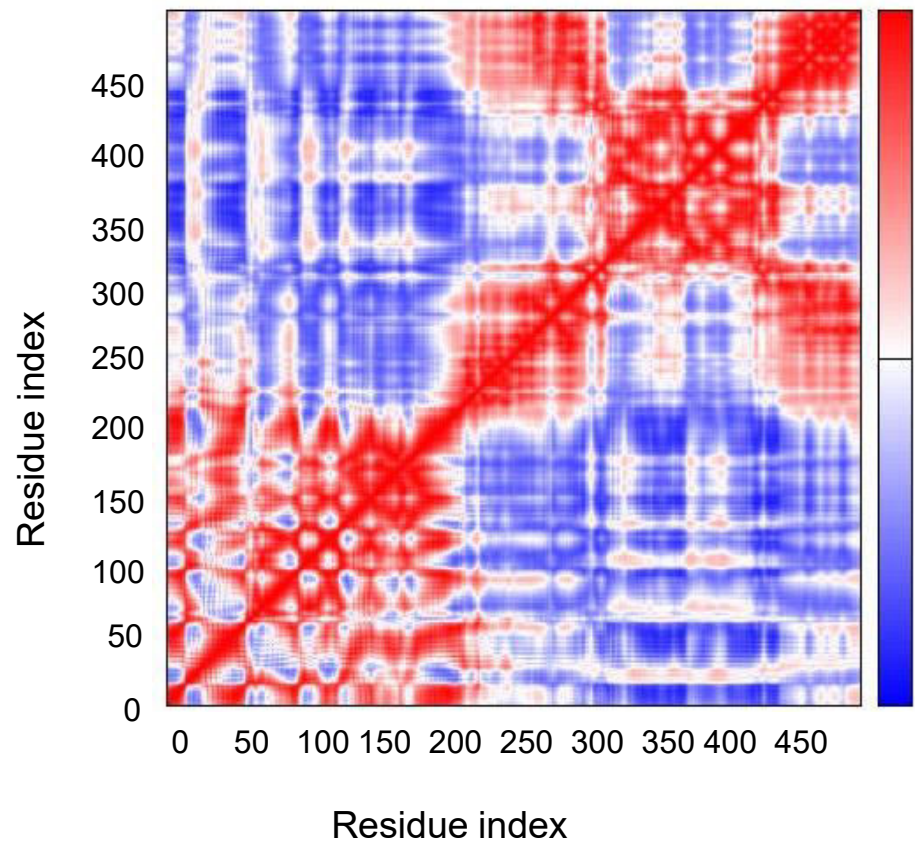

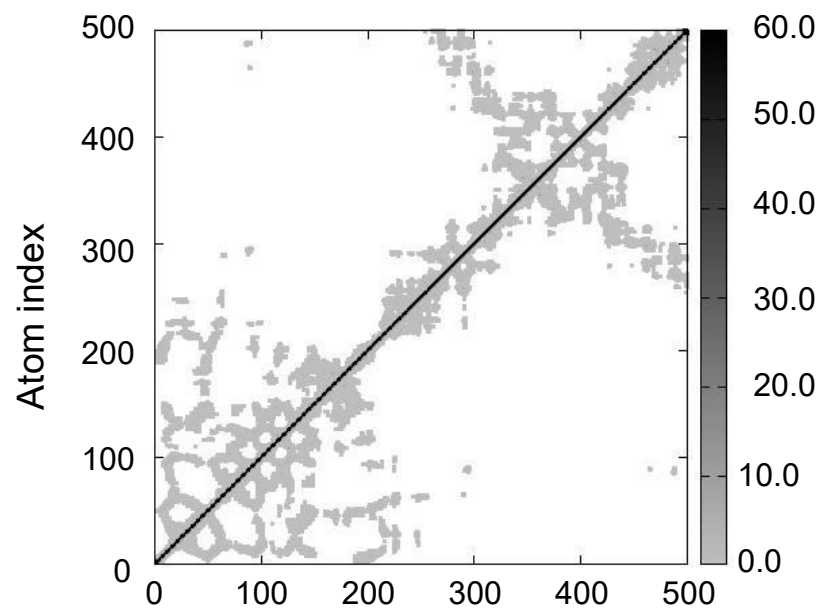

f

Atom index

Supplement: f1 [file 1089722.f1.zip]

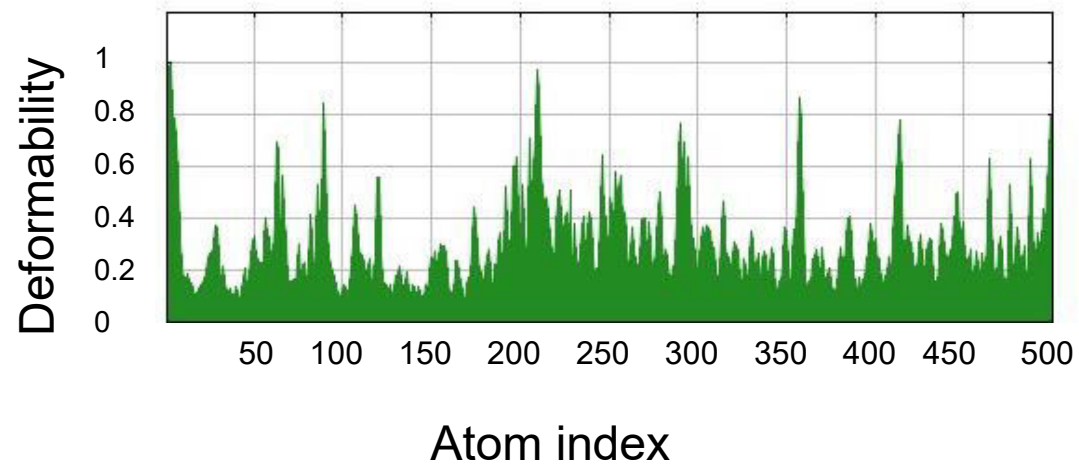

a

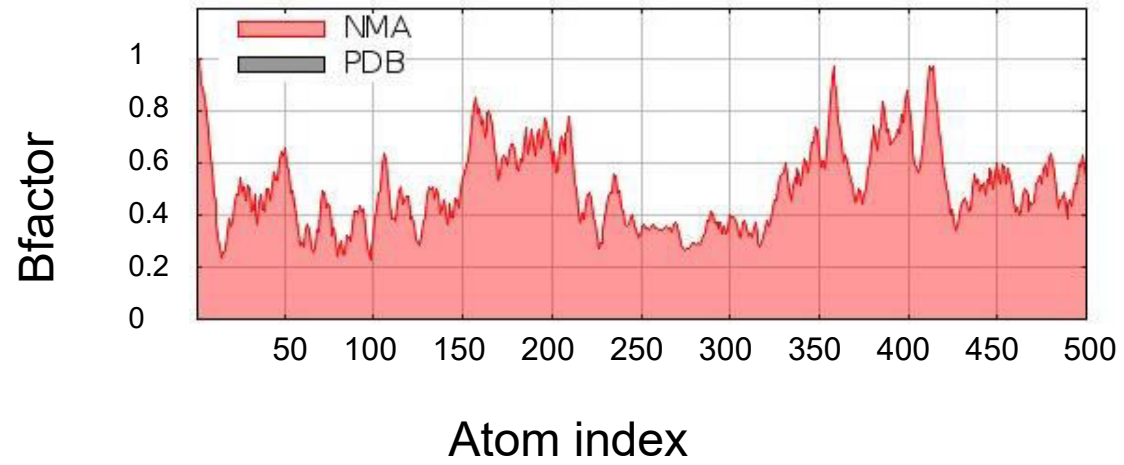

b

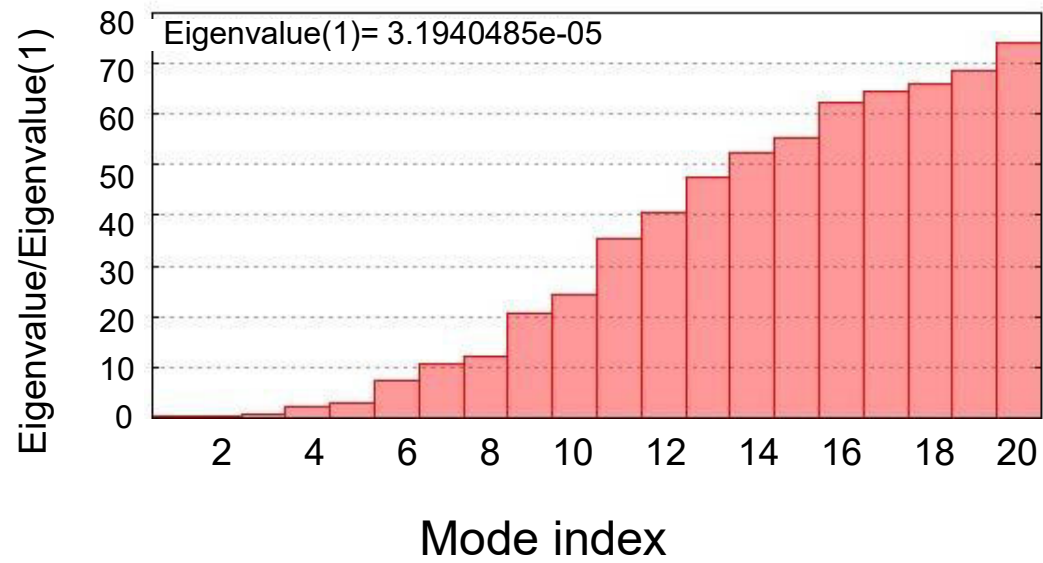

c

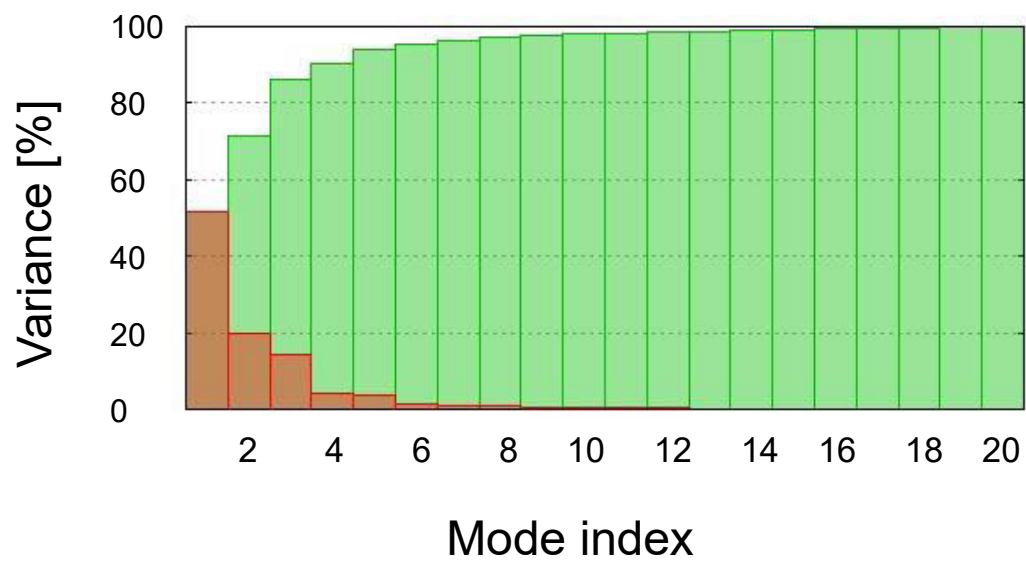

d

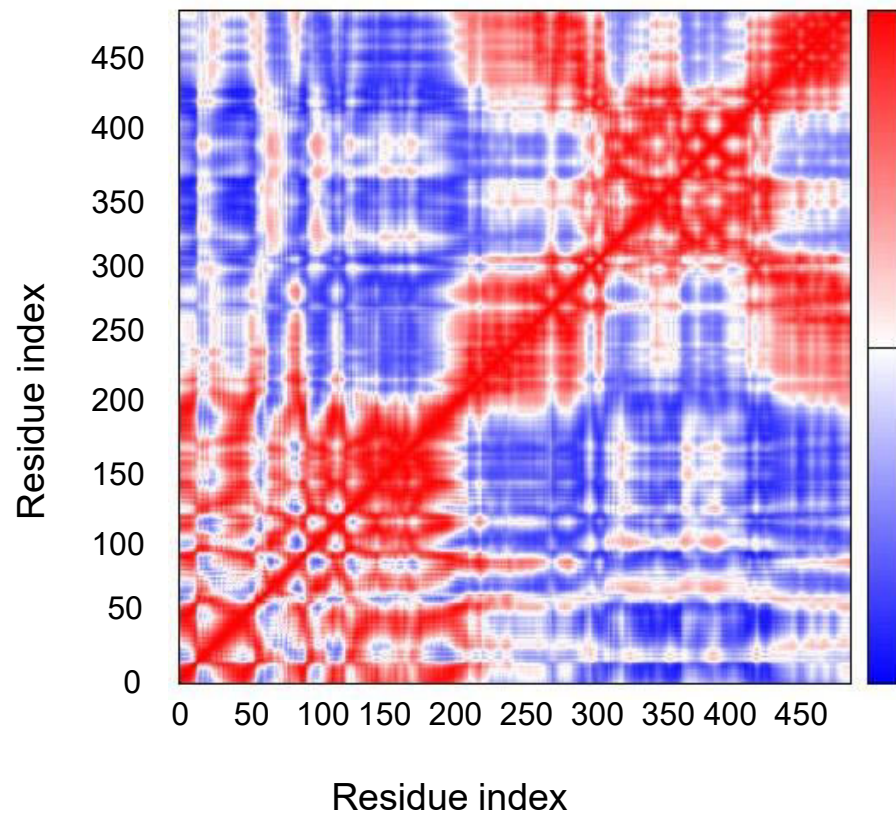

e

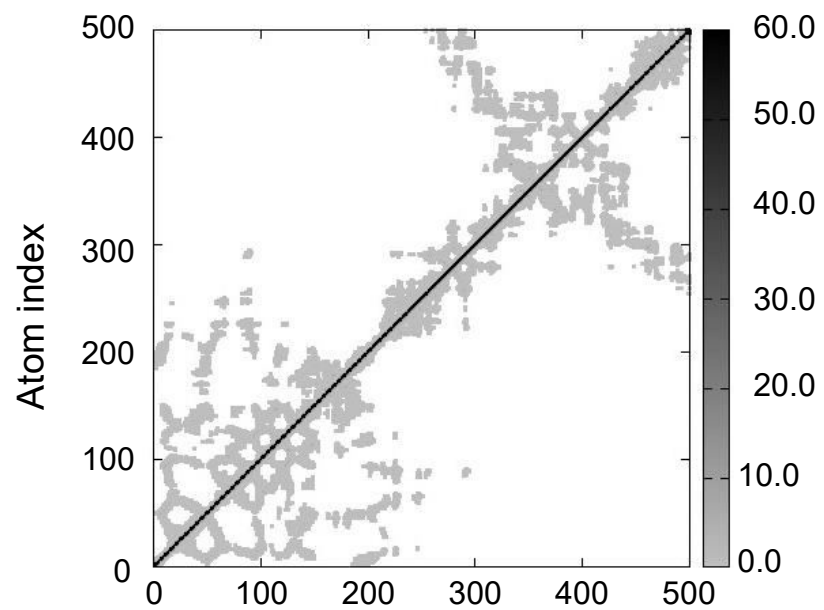

f

Atom index

Supplement: f1 [file 1089722.f1.zip]

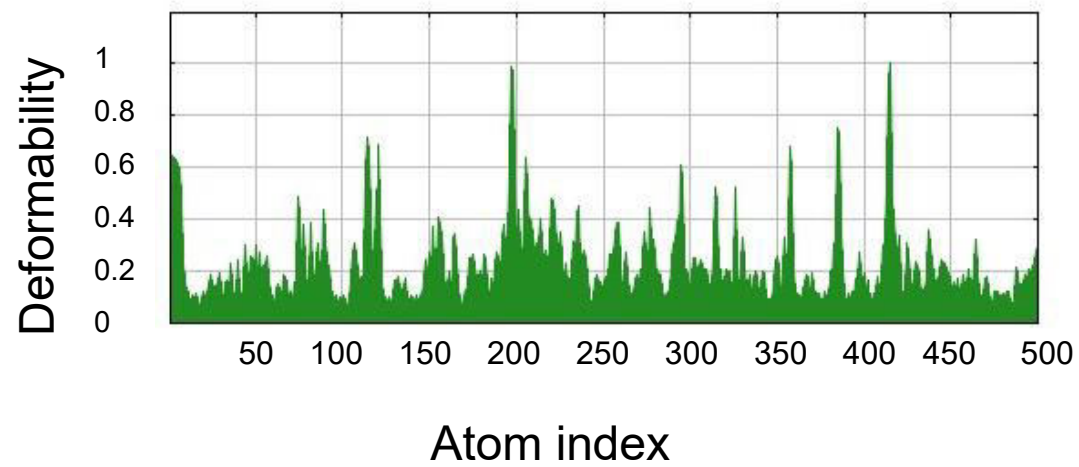

a

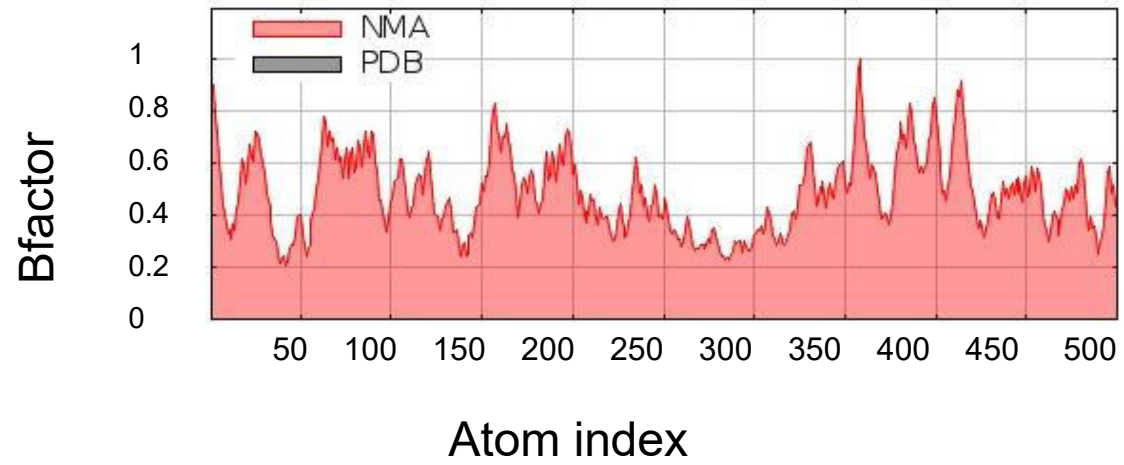

b

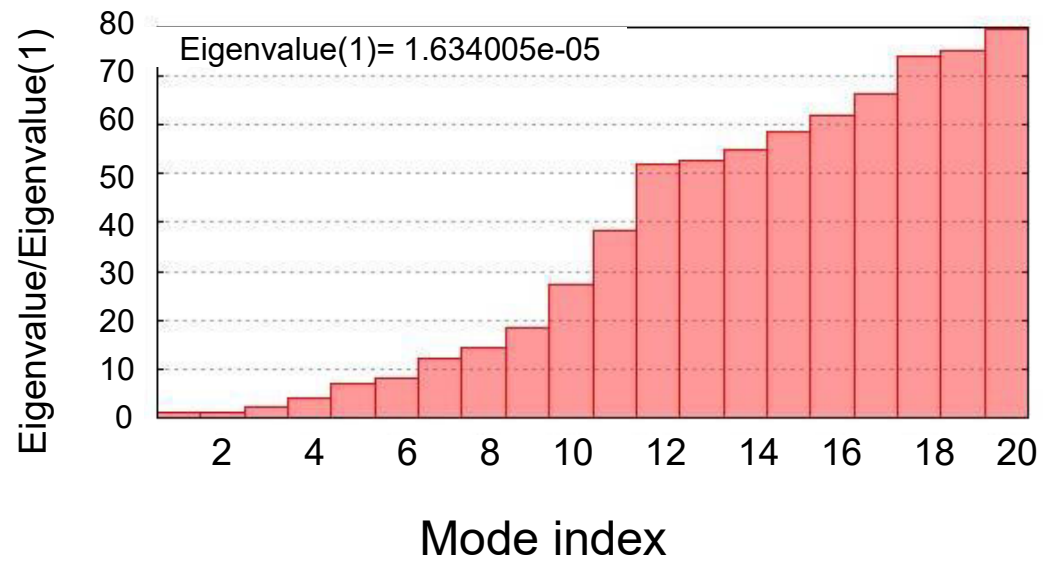

c

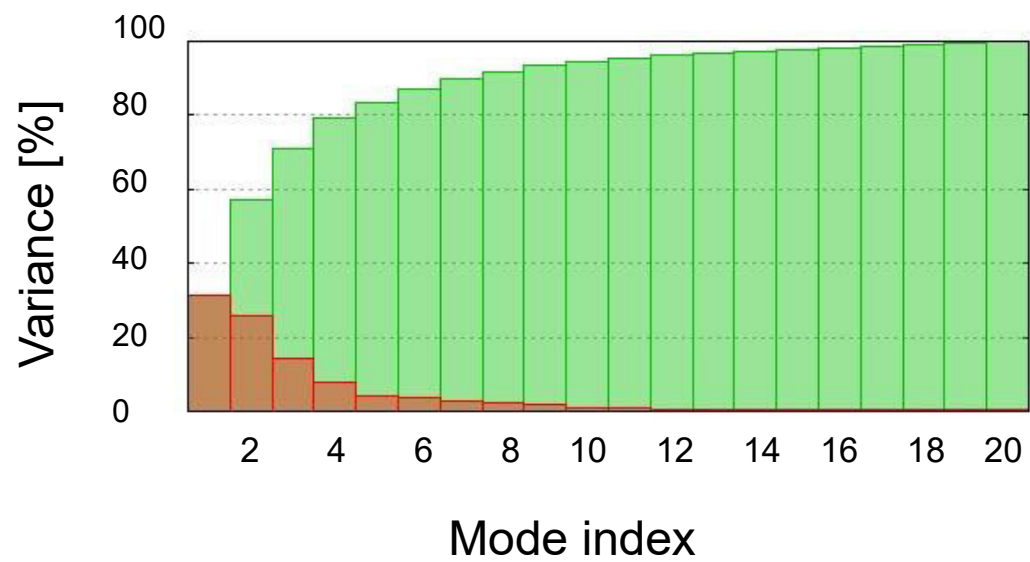

d

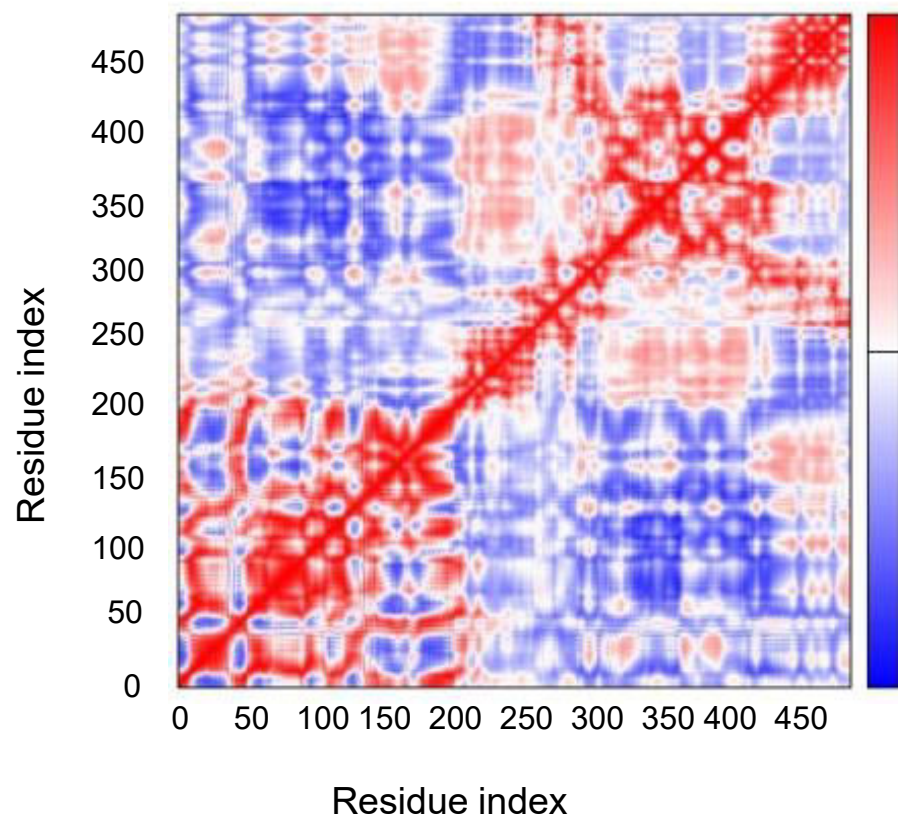

e

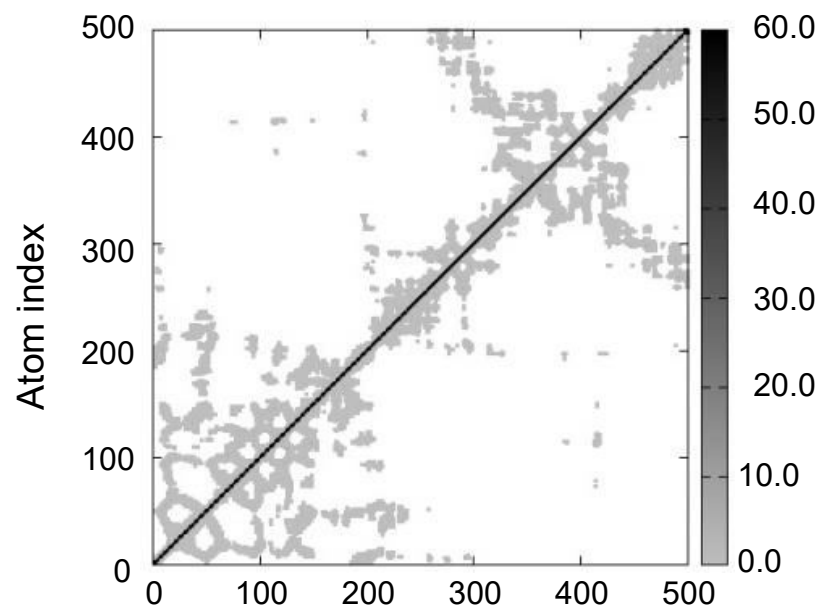

f

Atom index

Supplement: f1 [file 1089722.f1.zip]

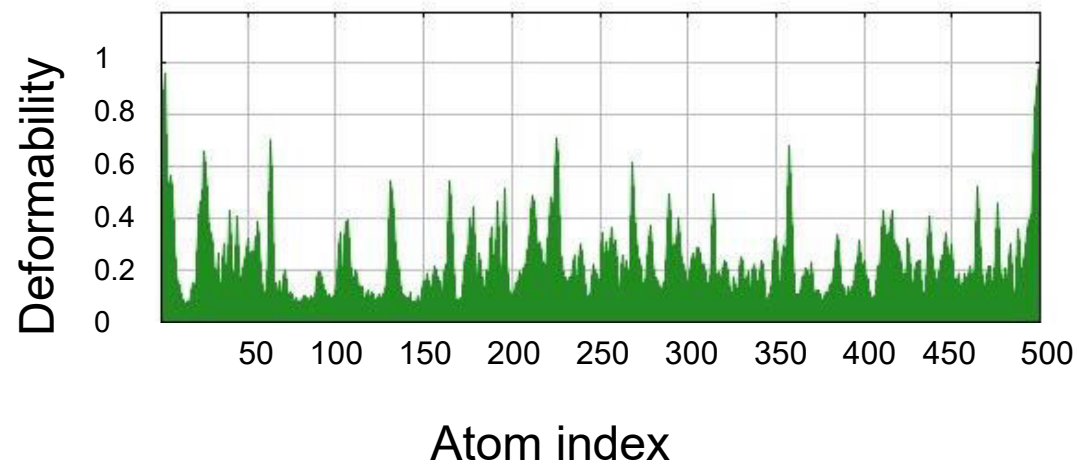

a

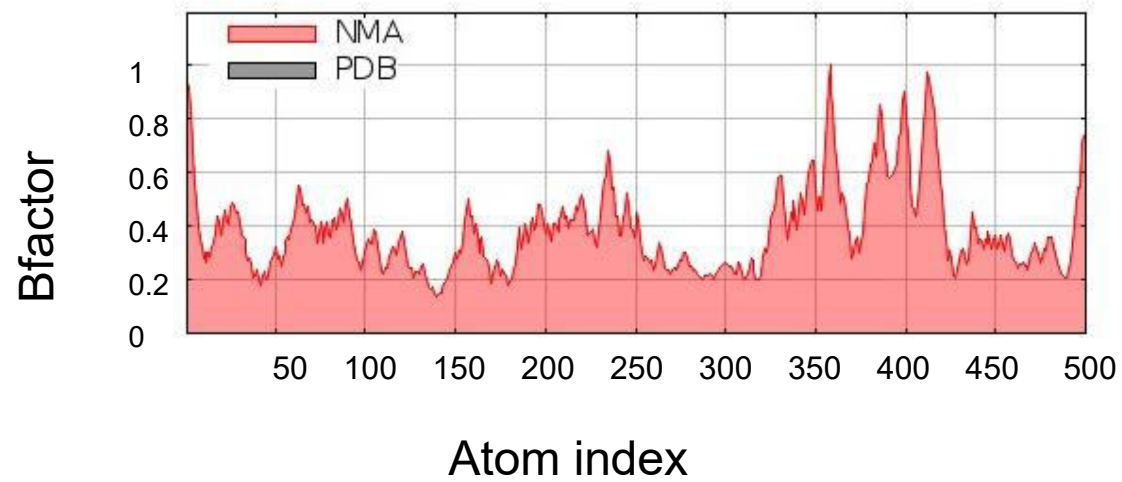

b

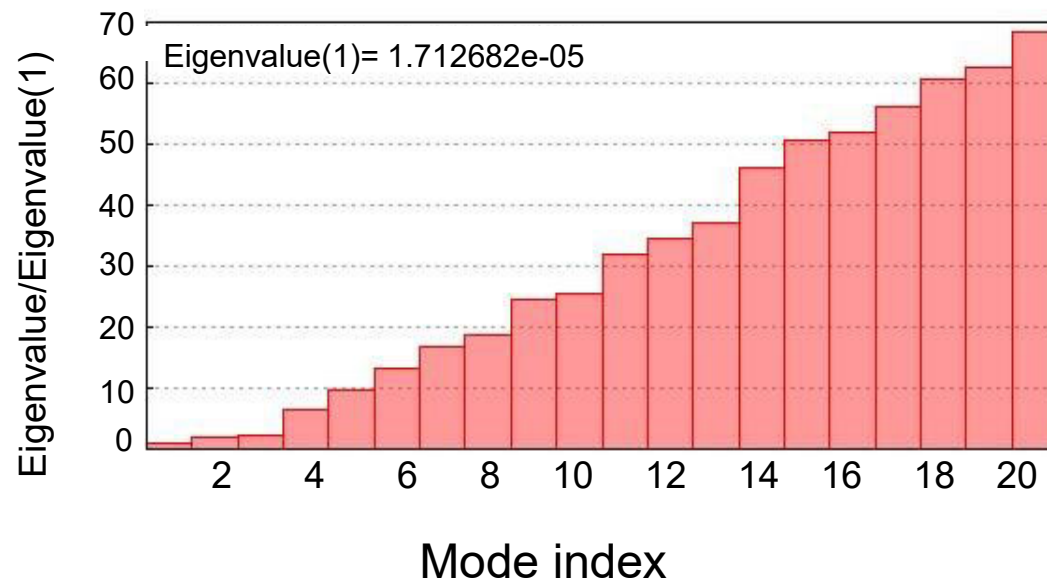

c

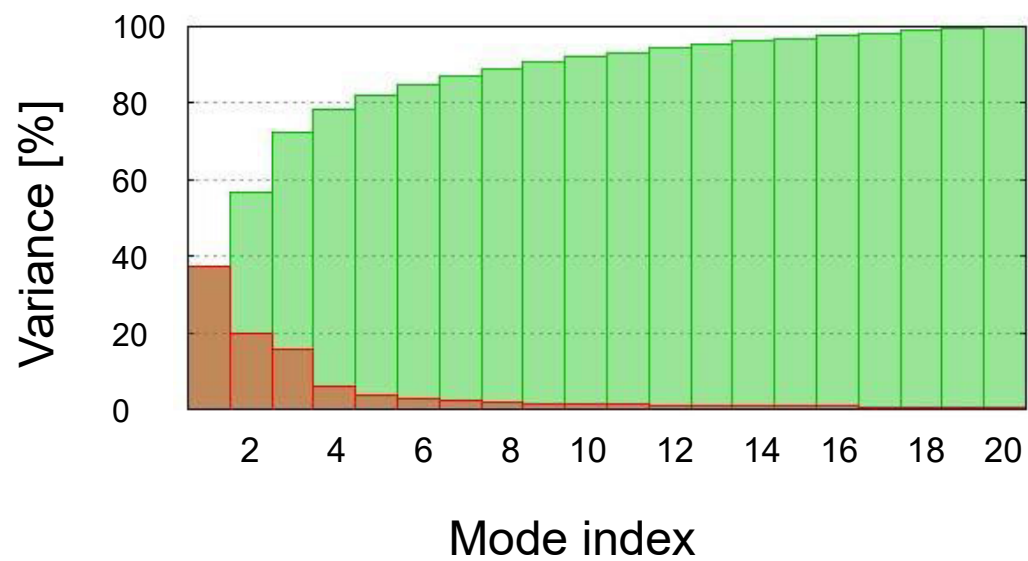

d

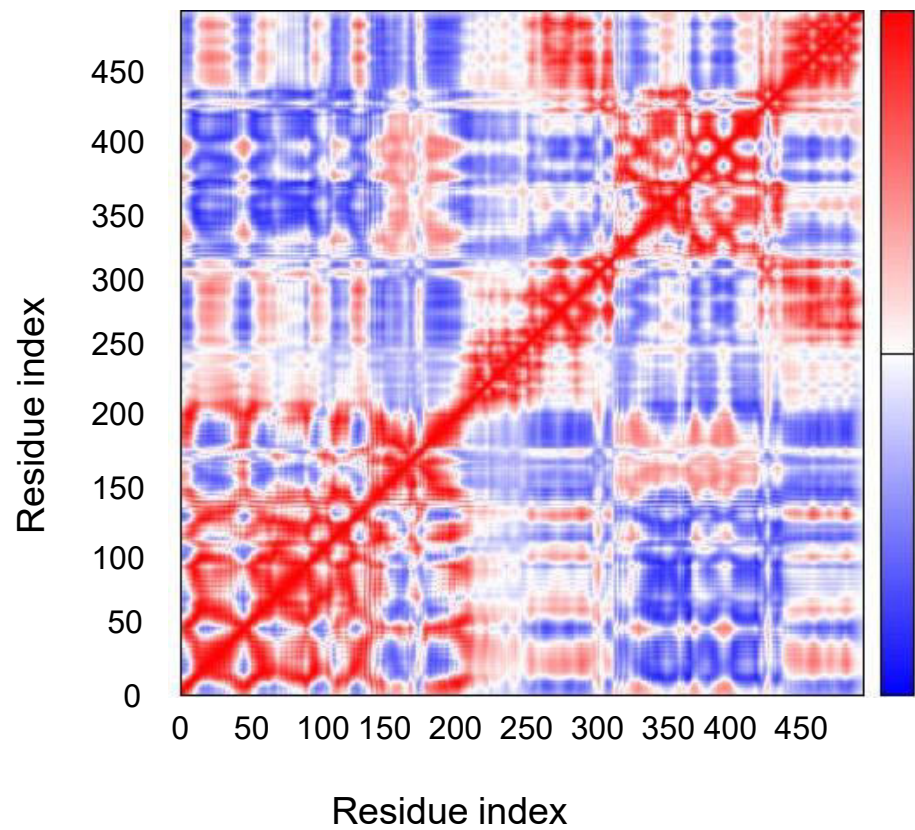

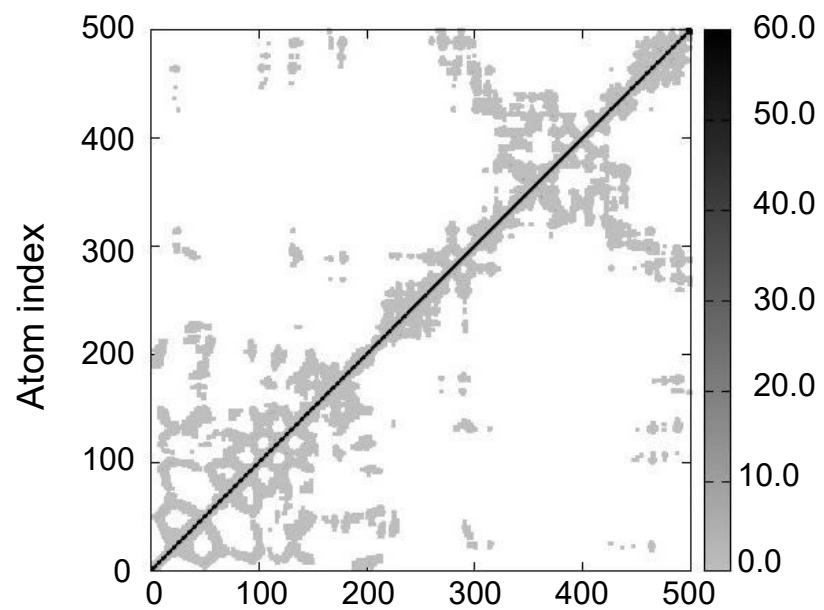

f

Atom index

Supplement: f1 [file 1089722.f1.zip]

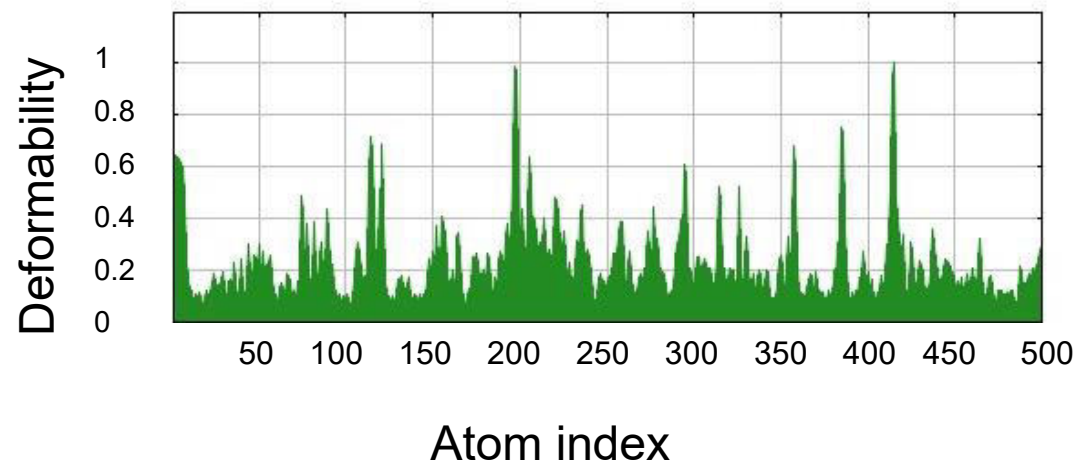

a

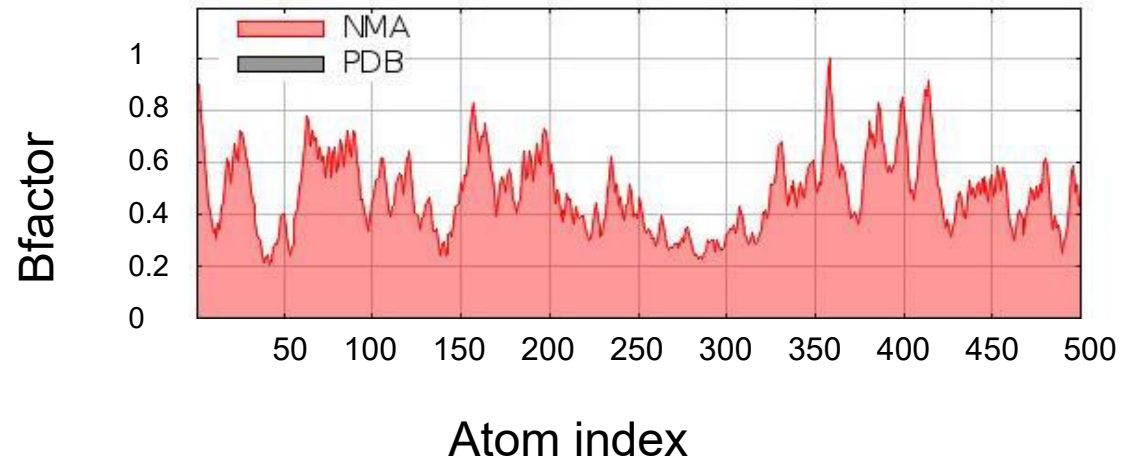

b

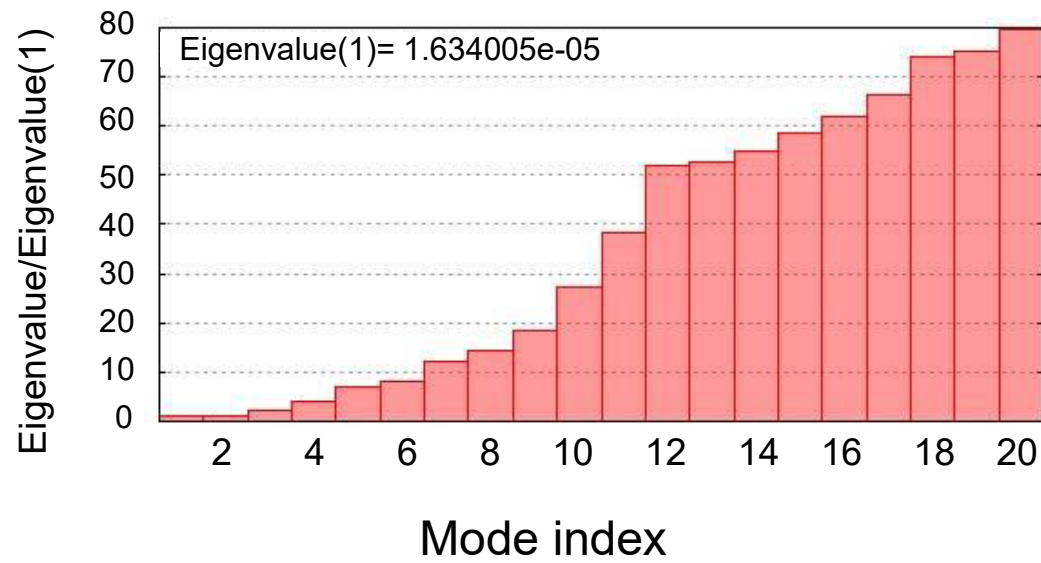

c

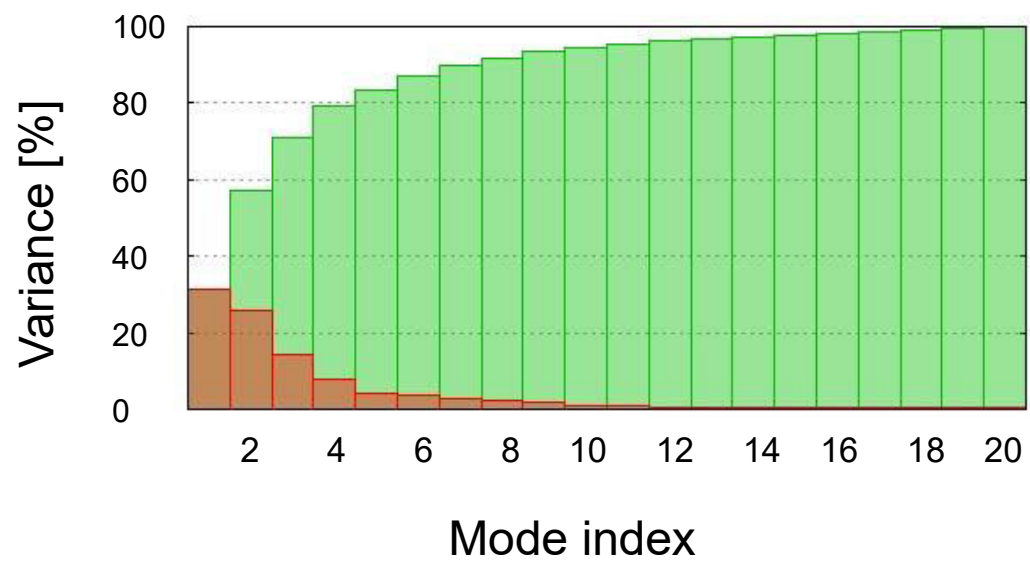

d

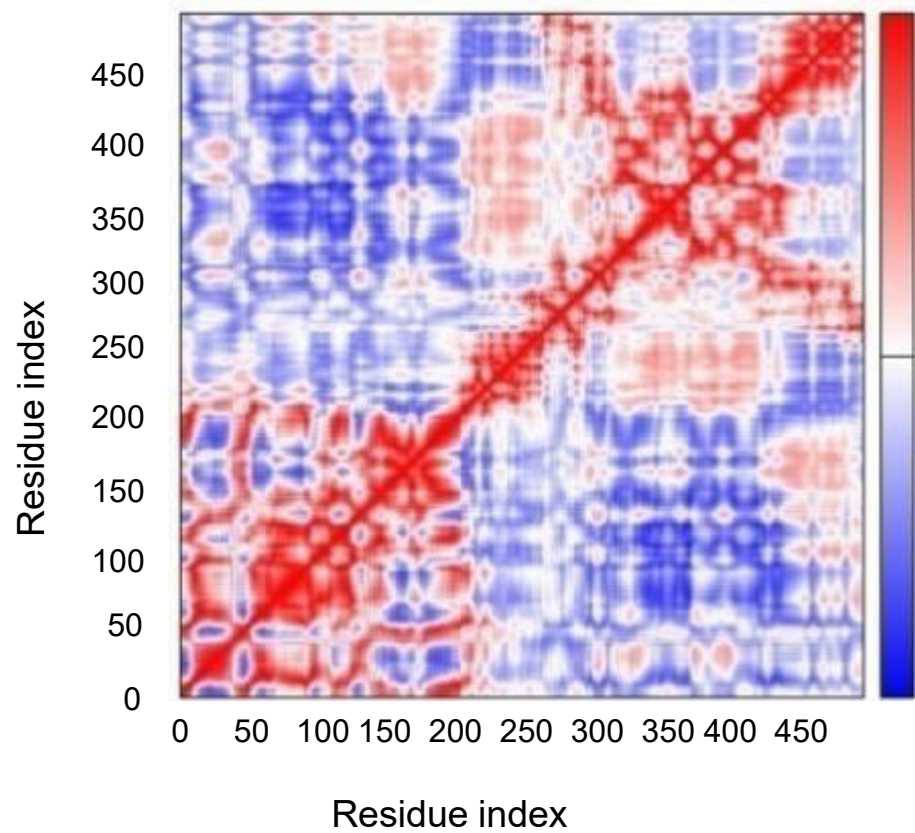

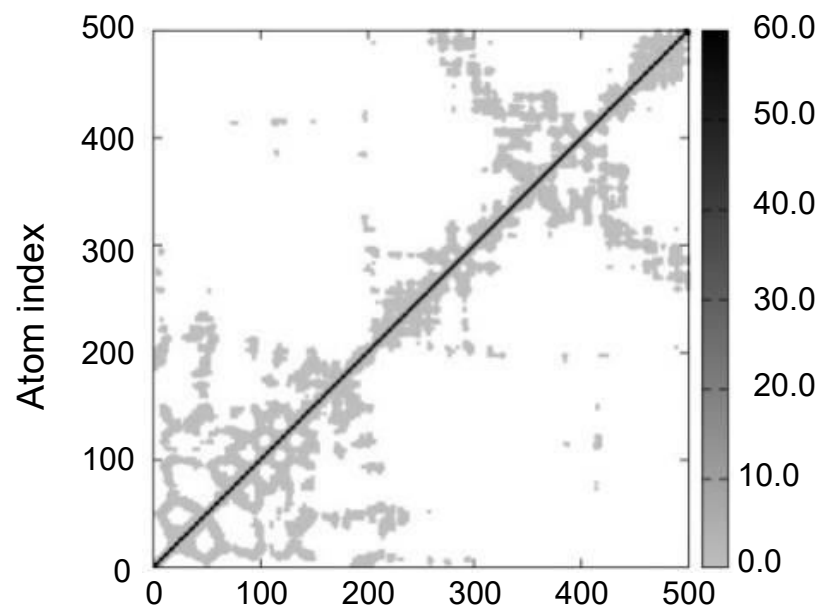

f

Atom index

Supplement: f1 [file 1089722.f1.zip]

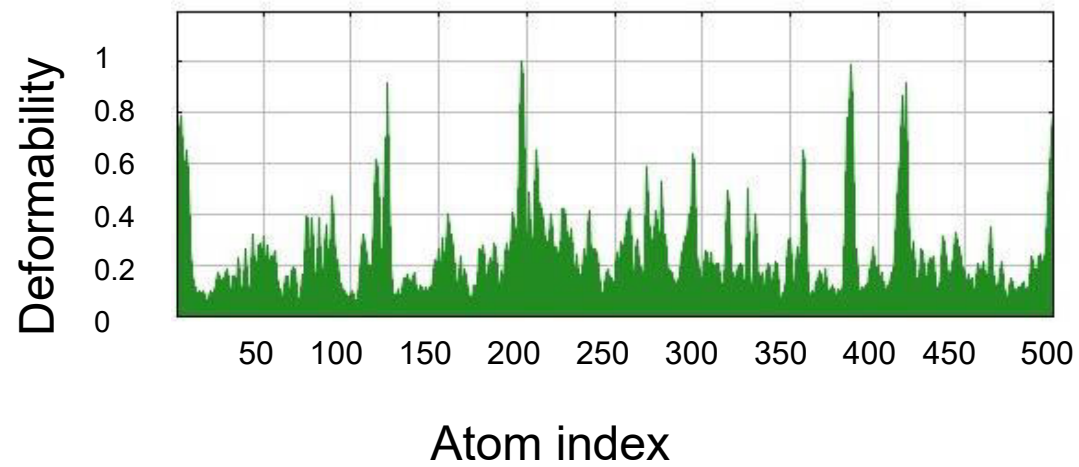

a

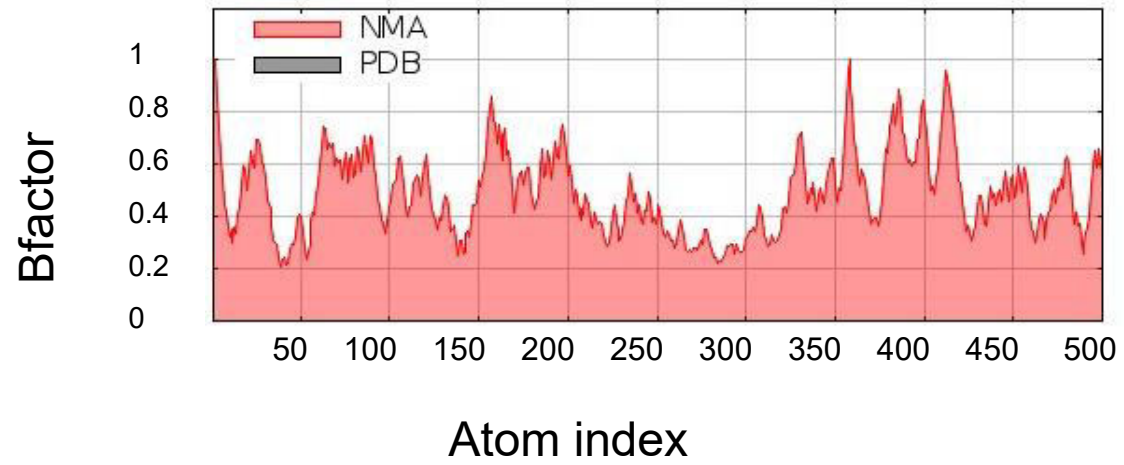

b

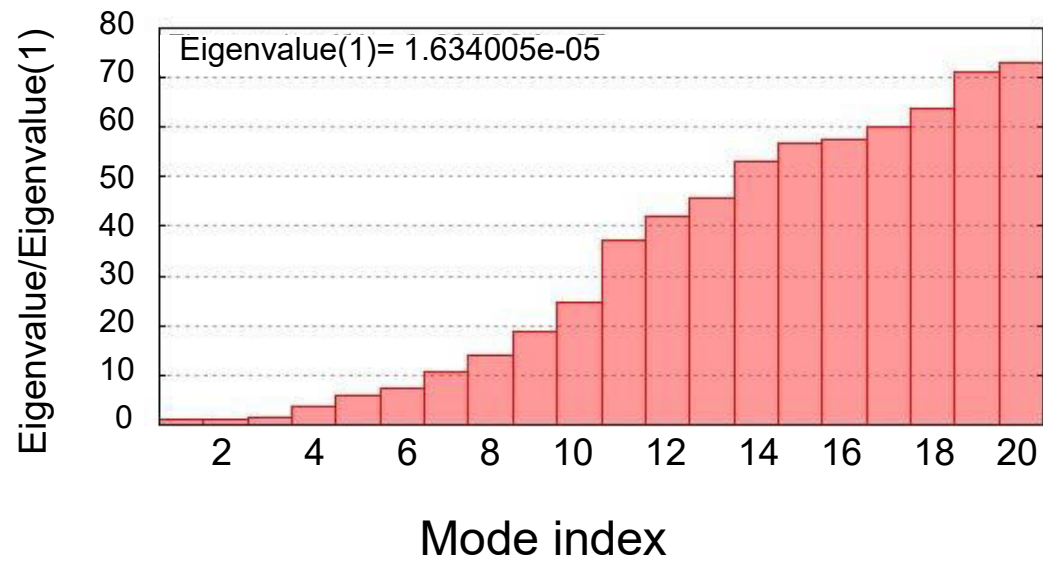

c

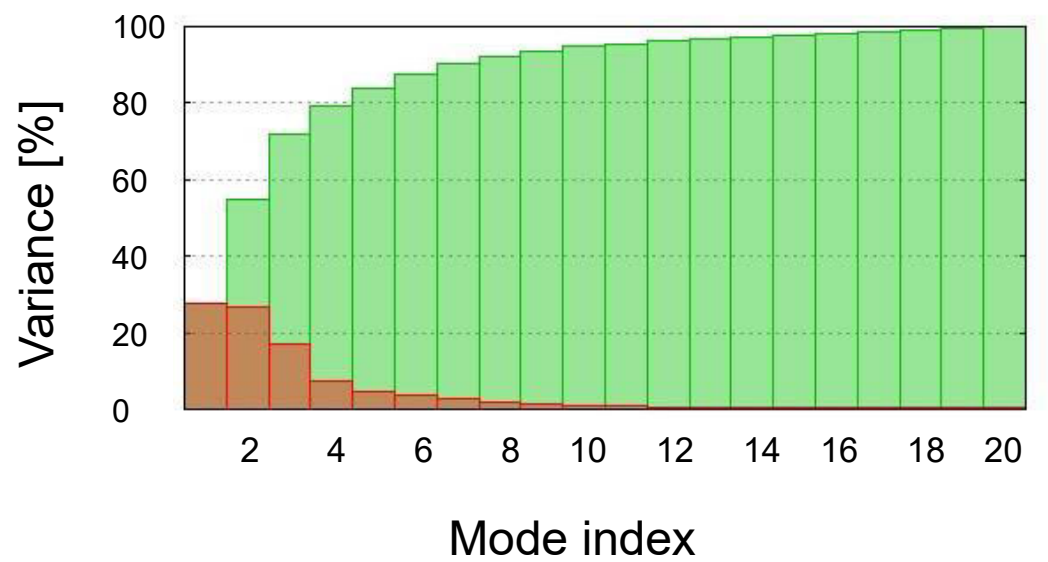

d

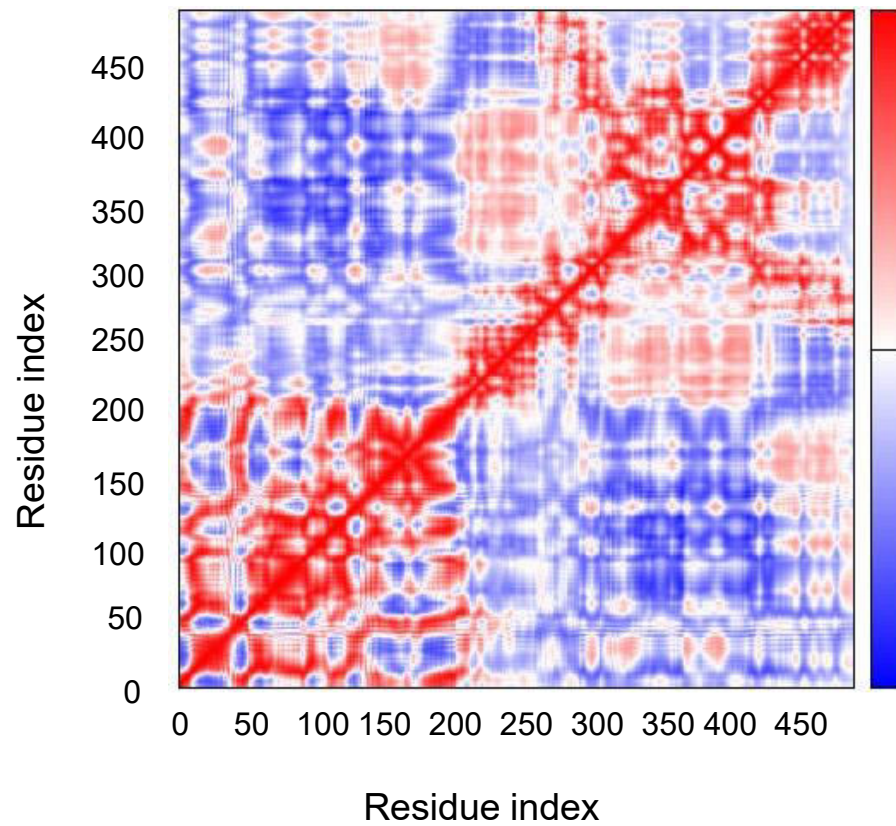

e

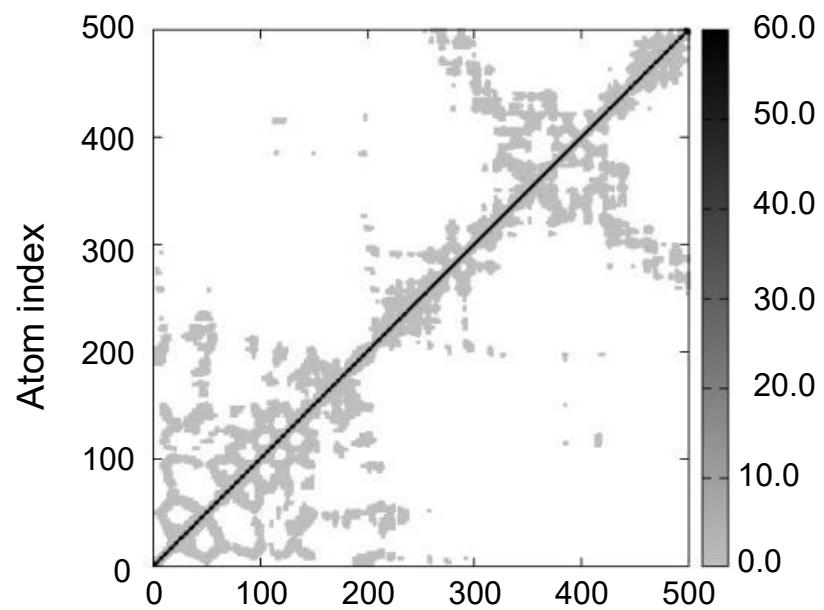

f

Atom index

Supplement: f1 [file 1089722.f1.zip]
